# Supplementary material
Source: PubMed Central journal article supplement (PMC3174681)
Supplement: NIHMS322662-supplement-SupTable1.pdf [file NIHMS322662-supplement-SupTable1.pdf]

# Supplemental Table 1

| Protein/Peptide                   | Scaffold Probability | SEQUEST Xcorr | Mascot Expect          |
|-----------------------------------|----------------------|---------------|------------------------|
| <b>Hsp90, beta</b>                | <b>100%</b>          |               |                        |
| ADLNNLGTIAK                       | 95%                  | 4.83          | 6.1 x 10 <sup>-4</sup> |
| ALLFIPR                           | 95%                  | 1.98          | 1.8                    |
| DLVLLFETALLSSGFSLEDPQTHSNR        | 95%                  | ----          | 4.4 x 10 <sup>-2</sup> |
| EDQTEYLEER                        | 95%                  | 3.31          | 5.3 x 10 <sup>-2</sup> |
| EGLELPEDEEEK                      | 95%                  | 2.27          | 5.0 x 10 <sup>-2</sup> |
| EGLELPEDEEEKK                     | 95%                  | 3.01          | 1.4 x 10 <sup>-1</sup> |
| EGLELPEDEEEKKK                    | 95%                  | 3.22          | 6.8 x 10 <sup>-3</sup> |
| ELISNASDALDK                      | 95%                  | 3.91          | 8.0 x 10 <sup>-6</sup> |
| FYEAFSK                           | 95%                  | 2.28          | 2.9 x 10 <sup>-2</sup> |
| GFEVVMTEPIDEYCVQQLK               | 95%                  | ----          | 1.7 x 10 <sup>-1</sup> |
| HFSVEGQLEFR                       | 95%                  | 3.36          | 5.1 x 10 <sup>-3</sup> |
| HLEINPDHPIVETLR                   | 95%                  | ----          | 9.6 x 10 <sup>-5</sup> |
| HNDDEQYAWESSAGGSFTVR              | 95%                  | ----          | 3.0 x 10 <sup>-4</sup> |
| HSQFIGYPITLYLEK                   | 95%                  | ----          | 3.1 x 10 <sup>-4</sup> |
| IDIIPNPQER                        | 95%                  | 2.61          | 2.0 x 10 <sup>-3</sup> |
| KHLEINPDHPIVETLR                  | 95%                  | ----          | 5.6 x 10 <sup>-2</sup> |
| KHSQFIGYPITLYLEK                  | 95%                  | ----          | 1.2 x 10 <sup>-1</sup> |
| LGIHEDSTNR                        | 95%                  | 2.68          | 5.0 x 10 <sup>-1</sup> |
| RAPFDLFENK                        | 95%                  | 3.58          | 2.7 x 10 <sup>-3</sup> |
| RAPFDLFENKK                       | 95%                  | 3.26          | 2.0 x 10 <sup>-3</sup> |
| SIYYITGESK                        | 95%                  | 3.52          | 1.5 x 10 <sup>-3</sup> |
| SLTNDWEDHLAVK                     | 95%                  | 3.7           | 2.7 x 10 <sup>-1</sup> |
| TLTLVDTGIGMTK                     | 95%                  | 3.83          | 5.2 x 10 <sup>-4</sup> |
| VILHLKEDQTEYLEER                  | 95%                  | ----          | 8.8 x 10 <sup>-1</sup> |
| YESLTDPSK                         | 95%                  | 2.51          | 4.6 x 10 <sup>-2</sup> |
| YESLTDPSKLDSGK                    | 95%                  | 3.45          | 1.4 x 10 <sup>-1</sup> |
| YHTSQSGDEMTSLSEYVSR               | 95%                  | ----          | 2.9 x 10 <sup>-2</sup> |
| YIDQEELNK                         | 95%                  | 3.06          | 6.4 x 10 <sup>-5</sup> |
| <b>Hsp70 protein 8, isoform 1</b> | <b>100%</b>          |               |                        |
| DAGTIAGLNVLR                      | 95%                  | 3.53          | 9.6 x 10 <sup>-5</sup> |
| GPAVGIDLGTTYSCVGVFQHGK            | 95%                  | ----          | 3.0 x 10 <sup>-4</sup> |
| HWPFMVNDAGRPK                     | 95%                  | 3.02          | 1.1                    |
| IINEPTAAAIAYGLDK                  | 95%                  | ----          | 1.7 x 10 <sup>-4</sup> |
| IINEPTAAAIAYGLDKK                 | 95%                  | ----          | 5.0 x 10 <sup>-2</sup> |
| MKEIAEAYLGK                       | 95%                  | 2.78          | 6.4 x 10 <sup>-3</sup> |
| MVNHFAEFK                         | 95%                  | 3.14          | 6.3 x 10 <sup>-3</sup> |
| NQVAMNPTNTVFDK                    | 95%                  | ----          | 1.7 x 10 <sup>-4</sup> |
| NSLESYAFNMK                       | 95%                  | 3.33          | 6.8 x 10 <sup>-4</sup> |
| QTQFTTTYSDNQPGVLIQVYEGER          | 95%                  | ----          | 3.4 x 10 <sup>-1</sup> |
| SINPDEAVAYGAAVQAAILSGDK           | 95%                  | ----          | 6.2 x 10 <sup>-7</sup> |
| SQIHDIVLVGGSTR                    | 95%                  | 4.71          | 9.4 x 10 <sup>-4</sup> |
| STAGDTHLGGEDFDNR                  | 95%                  | ----          | 1.2 x 10 <sup>-3</sup> |
| TTPSYVAFTDTER                     | 95%                  | 3.14          | 5.3 x 10 <sup>-4</sup> |
| TVTNAVVTVPAYFNDSQR                | 95%                  | ----          | 5.2 x 10 <sup>-4</sup> |
| <b>Hsp70 protein 1B</b>           | <b>100%</b>          |               |                        |
| AQIHDLVLVGGSTR                    | 95%                  | 4.34          | 3.3 x 10 <sup>-4</sup> |
| ATAGDTHLGGEDFDNR                  | 95%                  | ----          | 1.7 x 10 <sup>-2</sup> |
| DAGVIAGLNVLR                      | 95%                  | 3.58          | 2.0 x 10 <sup>-6</sup> |
| IINEPTAAAIAYGLDR                  | 95%                  | ----          | 8.2 x 10 <sup>-5</sup> |
| NQVALNPQNTVFDK                    | 95%                  | ----          | 4.5 x 10 <sup>-1</sup> |
| SINPDEAVAYGAAVQAAILMGDK           | 95%                  | ----          | 9.9 x 10 <sup>-5</sup> |
| TTPSYVAFTDTER                     | 95%                  | 3.14          | 5.3 x 10 <sup>-4</sup> |
| <b>Hsp70 protein 9 precursor</b>  | <b>100%</b>          |               |                        |
| AQFEGIVTDLIR                      | 95%                  | 4.14          | 1.3 x 10 <sup>-3</sup> |
| DAGQISGLNVLR                      | 95%                  | 3.54          | 5.9 x 10 <sup>-4</sup> |
| SDIGEVLVGGMTR                     | 95%                  | 2.68          | 1.3 x 10 <sup>-1</sup> |
| STNGDTFLGGEDFDQALLR               | 95%                  | ----          | 7.8 x 10 <sup>-4</sup> |
| TTPSVVAFTADGER                    | 95%                  | 2.47          | 2.5 x 10 <sup>-1</sup> |
| VINEPTAAALAYGLDK                  | 95%                  | ----          | 2.5 x 10 <sup>-4</sup> |
| <b>Survivin</b>                   | <b>100%</b>          |               |                        |
| AIEQLAAMD                         | 95%                  | 1.04          | 99                     |
| ELEGWEPDDDPIEEHKK                 | 95%                  | ----          | 0.048                  |
| MAEAGFIHCPTENEPDLAQCFFCFK         | 95%                  | ----          | 0.046                  |
| NWPFLEGCACTER                     | 95%                  | 3.2           | 4.8                    |

The Scaffold score for peptides and proteins represents the probability of a correct assignment as calculated by PeptideProphet [24] and ProteinProphet [25], respectively. The PeptideProphet probability represents a consensus of SEQUEST, Mascot, and X!Tandem scores when available for a given peptide. The Sequest Xcorr values of greater than 1.73 and 1.97 for single and double charged peptides, respectively, have been empirically shown to represent a 95% probability of a correct assignment [52]. The expected number of hits for each peptide that will occur by random chance during a Mascot search of the database is shown in the last column.
